# Supplementary material for: Hierarchical analysis of the target-based scoring function modification for the example of selected class A GPCRs
Source: Royal Society of Chemistry journal article supplement (doi:10.1039/d2cp04671g), 2022-12-16
Supplement: d2cp04671g1.xlsx [file d2cp04671g1.xlsx]

## Sheet: ligands
CHEMBL code for ligands used in the study
receptor	basket	training set	testing1 set	testing2 set
5-HT1B	B1	CHEMBL147901	CHEMBL282950	CHEMBL200315
		CHEMBL282229	CHEMBL496520	CHEMBL489393
		CHEMBL500488	CHEMBL1290716	CHEMBL1241641
		CHEMBL424128	CHEMBL1241642	CHEMBL1290487
	B2	CHEMBL1632219	CHEMBL111150	CHEMBL325175
		CHEMBL197007	CHEMBL196862	CHEMBL1632223
		CHEMBL1241825	CHEMBL1632221	CHEMBL485491
		CHEMBL105369	CHEMBL2113097	CHEMBL1241546
	B3	CHEMBL110601	CHEMBL2111779	CHEMBL456684
		CHEMBL143767	CHEMBL472117	CHEMBL94612
		CHEMBL485427	CHEMBL195897	CHEMBL525712
		CHEMBL552599	CHEMBL318735	CHEMBL366322
	B45	CHEMBL71899	CHEMBL126340	CHEMBL297471
		CHEMBL494991	CHEMBL239167	CHEMBL173162
		CHEMBL191921	CHEMBL82488	CHEMBL422737
		CHEMBL513955	CHEMBL97596	CHEMBL263700
		CHEMBL297660	CHEMBL361303	CHEMBL56
		CHEMBL494631	CHEMBL71299	CHEMBL413105
		CHEMBL442087	CHEMBL2413153	CHEMBL136470
		CHEMBL363413	CHEMBL3764650	CHEMBL1258223
		CHEMBL330171	CHEMBL1287827	CHEMBL3706923
		CHEMBL497979	CHEMBL312525	CHEMBL1159649
		CHEMBL423127	CHEMBL105743	CHEMBL2260930
		CHEMBL83732	CHEMBL225308	CHEMBL302172
		CHEMBL452861	CHEMBL138907	CHEMBL582877
		CHEMBL269538	CHEMBL84305	CHEMBL1278001
		CHEMBL311787	CHEMBL72167	CHEMBL309976
		CHEMBL450281	CHEMBL76237	CHEMBL2031737
		CHEMBL133455	CHEMBL273921	CHEMBL1258723
		CHEMBL1642889	CHEMBL182837	CHEMBL3609140
		CHEMBL1277105	CHEMBL2181188	CHEMBL1258452
		CHEMBL484742	CHEMBL716	CHEMBL1258671
		CHEMBL1242950	CHEMBL569270	CHEMBL520129
		CHEMBL1289618	CHEMBL449406	CHEMBL2436555
		CHEMBL256263	CHEMBL3936289	CHEMBL282424
		CHEMBL10085	CHEMBL108395	CHEMBL3763779
5-HT2B	B1	CHEMBL2165137	CHEMBL19215	CHEMBL3343668
		CHEMBL2323581	CHEMBL1201356	CHEMBL3310115
		CHEMBL2323580	CHEMBL272082	CHEMBL2165126
		CHEMBL3092758	CHEMBL196514	CHEMBL3310714
	B2	CHEMBL14458	CHEMBL55914	CHEMBL76781
		CHEMBL2337501	CHEMBL297784	CHEMBL3310110
		CHEMBL590580	CHEMBL14022	CHEMBL54707
		CHEMBL133455	CHEMBL2397891	CHEMBL2397890
	B3	CHEMBL1910140	CHEMBL582877	CHEMBL201930
		CHEMBL55784	CHEMBL1222693	CHEMBL53308
		CHEMBL590089	CHEMBL55331	CHEMBL3815066
		CHEMBL203393	CHEMBL3402677	CHEMBL590531
	B45	CHEMBL3402684	CHEMBL233898	CHEMBL598851
		CHEMBL212769	CHEMBL1214892	CHEMBL396527
		CHEMBL1222626	CHEMBL396748	CHEMBL197807
		CHEMBL590721	CHEMBL380763	CHEMBL3971383
		CHEMBL3093186	CHEMBL2397881	CHEMBL3924565
		CHEMBL3970994	CHEMBL3898250	CHEMBL520129
		CHEMBL3593950	CHEMBL3958215	CHEMBL1258671
		CHEMBL2058417	CHEMBL2442273	CHEMBL3817898
		CHEMBL316527	CHEMBL203013	CHEMBL2337104
		CHEMBL427398	CHEMBL1940402	CHEMBL2181169
		CHEMBL2058426	CHEMBL1834251	CHEMBL1834259
		CHEMBL3402678	CHEMBL1222763	CHEMBL364061
		CHEMBL1276050	CHEMBL862	CHEMBL2442265
		CHEMBL91	CHEMBL229429	CHEMBL1276860
		CHEMBL490633	CHEMBL1277854	CHEMBL1170237
		CHEMBL474474	CHEMBL404232	CHEMBL198123
		CHEMBL388590	CHEMBL211103	CHEMBL307770
		CHEMBL1091106	CHEMBL291536	CHEMBL1949930
		CHEMBL2058408	CHEMBL3928983	CHEMBL2037526
		CHEMBL599023	CHEMBL1067	CHEMBL1405
		CHEMBL479683	CHEMBL1278112	CHEMBL3593952
		CHEMBL1224036	CHEMBL385921	CHEMBL29410
		CHEMBL900	CHEMBL2397903	CHEMBL374660
		CHEMBL3941980	CHEMBL198440	CHEMBL90467
5-HT2C	B1	CHEMBL1091105	CHEMBL574985	CHEMBL14606
		CHEMBL14276	CHEMBL605405	CHEMBL14362
		CHEMBL14374	CHEMBL40726	CHEMBL14460
		CHEMBL596327	CHEMBL329566	CHEMBL54719
	B2	CHEMBL196953	CHEMBL53113	CHEMBL206845
		CHEMBL3104091	CHEMBL569510	CHEMBL233440
		CHEMBL3589580	CHEMBL43808	CHEMBL76781
		CHEMBL388882	CHEMBL92656	CHEMBL91855
	B3	CHEMBL90263	CHEMBL290666	CHEMBL88193
		CHEMBL203396	CHEMBL3589593	CHEMBL305123
		CHEMBL2397887	CHEMBL76781	CHEMBL1909065
		CHEMBL2337497	CHEMBL272781	CHEMBL383051
	B45	CHEMBL3286584	CHEMBL2113386	CHEMBL3286590
		CHEMBL162768	CHEMBL89125	CHEMBL155257
		CHEMBL590089	CHEMBL172269	CHEMBL3233430
		CHEMBL3759802	CHEMBL3286585	CHEMBL606556
		CHEMBL1946233	CHEMBL198123	CHEMBL572708
		CHEMBL1090400	CHEMBL75738	CHEMBL2181166
		CHEMBL2181188	CHEMBL1201216	CHEMBL43819
		CHEMBL38742	CHEMBL2058704	CHEMBL88248
		CHEMBL318659	CHEMBL1215661	CHEMBL380682
		CHEMBL30008	CHEMBL523680	CHEMBL3736252
		CHEMBL1411979	CHEMBL2391541	CHEMBL1277935
		CHEMBL157910	CHEMBL3905850	CHEMBL444269
		CHEMBL328114	CHEMBL240839	CHEMBL372244
		CHEMBL220521	CHEMBL474474	CHEMBL545727
		CHEMBL3092759	CHEMBL69733	CHEMBL222301
		CHEMBL1082211	CHEMBL3941738	CHEMBL1214808
		CHEMBL2037430	CHEMBL410512	CHEMBL153956
		CHEMBL1306	CHEMBL2397903	CHEMBL2397883
		CHEMBL1083750	CHEMBL3959210	CHEMBL269073
		CHEMBL240454	CHEMBL242566	CHEMBL520129
		CHEMBL290106	CHEMBL2331792	CHEMBL63354
		CHEMBL1277104	CHEMBL103479	CHEMBL3233414
		CHEMBL445102	CHEMBL43697	CHEMBL1224106
		CHEMBL1214732	CHEMBL3233421	CHEMBL476109
A1	B1	CHEMBL16867	CHEMBL385109	CHEMBL3545407
		CHEMBL2165801	CHEMBL592435	CHEMBL2391834
		CHEMBL2419137	CHEMBL449575	CHEMBL1090578
		CHEMBL512276	CHEMBL262363	CHEMBL477444
	B2	CHEMBL232516	CHEMBL68738	CHEMBL134837
		CHEMBL224453	CHEMBL2165799	CHEMBL400746
		CHEMBL204779	CHEMBL393916	CHEMBL3642151
		CHEMBL328437	CHEMBL313306	CHEMBL513867
	B3	CHEMBL1277845	CHEMBL1935753	CHEMBL1760886
		CHEMBL2024119	CHEMBL427255	CHEMBL256344
		CHEMBL296389	CHEMBL375164	CHEMBL209217
		CHEMBL388505	CHEMBL208311	CHEMBL1088260
	B45	CHEMBL611095	CHEMBL437344	CHEMBL3797284
		CHEMBL203660	CHEMBL2261342	CHEMBL222092
		CHEMBL1094548	CHEMBL342059	CHEMBL475146
		CHEMBL194830	CHEMBL410066	CHEMBL2071047
		CHEMBL164905	CHEMBL1221459	CHEMBL3222053
		CHEMBL3800587	CHEMBL141154	CHEMBL351075
		CHEMBL409229	CHEMBL253252	CHEMBL1800788
		CHEMBL1170135	CHEMBL58380	CHEMBL488151
		CHEMBL255699	CHEMBL359379	CHEMBL555577
		CHEMBL180559	CHEMBL550313	CHEMBL1946299
		CHEMBL289982	CHEMBL1081041	CHEMBL409152
		CHEMBL179684	CHEMBL1290436	CHEMBL611090
		CHEMBL344724	CHEMBL1290664	CHEMBL52735
		CHEMBL3407529	CHEMBL100121	CHEMBL2377108
		CHEMBL2153611	CHEMBL3114141	CHEMBL3222100
		CHEMBL3114139	CHEMBL474623	CHEMBL301403
		CHEMBL188506	CHEMBL118507	CHEMBL3222109
		CHEMBL3217881	CHEMBL402848	CHEMBL286102
		CHEMBL572602	CHEMBL235296	CHEMBL515088
		CHEMBL449108	CHEMBL16724	CHEMBL1834626
		CHEMBL596027	CHEMBL486282	CHEMBL3403728
		CHEMBL251875	CHEMBL427887	CHEMBL3827207
		CHEMBL589080	CHEMBL2151252	CHEMBL475030
		CHEMBL200350	CHEMBL331372	CHEMBL194132
A2A	B1	CHEMBL256331	CHEMBL270654	CHEMBL1762509
		CHEMBL401321	CHEMBL3121728	CHEMBL1800358
		CHEMBL3764083	CHEMBL2419150	CHEMBL403846
		CHEMBL1088247	CHEMBL273094	CHEMBL255739
	B2	CHEMBL300624	CHEMBL517278	CHEMBL1095488
		CHEMBL489126	CHEMBL1099028	CHEMBL259832
		CHEMBL258006	CHEMBL3314883	CHEMBL3981924
		CHEMBL3121732	CHEMBL1935762	CHEMBL1088260
	B3	CHEMBL3694774	CHEMBL3121730	CHEMBL2024113
		CHEMBL113542	CHEMBL421420	CHEMBL201749
		CHEMBL270761	CHEMBL258960	CHEMBL596075
		CHEMBL330286	CHEMBL350830	CHEMBL1270610
	B45	CHEMBL1950664	CHEMBL403704	CHEMBL509367
		CHEMBL3965390	CHEMBL164275	CHEMBL375631
		CHEMBL491097	CHEMBL2181163	CHEMBL260495
		CHEMBL97757	CHEMBL260337	CHEMBL258834
		CHEMBL1760901	CHEMBL2391833	CHEMBL207434
		CHEMBL349464	CHEMBL484899	CHEMBL1512545
		CHEMBL1089131	CHEMBL203797	CHEMBL506888
		CHEMBL261453	CHEMBL2181143	CHEMBL474058
		CHEMBL1087081	CHEMBL1098443	CHEMBL2113463
		CHEMBL99983	CHEMBL506450	CHEMBL1671919
		CHEMBL201329	CHEMBL2181162	CHEMBL220587
		CHEMBL197359	CHEMBL2180916	CHEMBL2391837
		CHEMBL187766	CHEMBL1080327	CHEMBL1955918
		CHEMBL1762512	CHEMBL464076	CHEMBL232516
		CHEMBL1096693	CHEMBL7327	CHEMBL1650366
		CHEMBL197634	CHEMBL2030683	CHEMBL2151127
		CHEMBL600610	CHEMBL574602	CHEMBL412284
		CHEMBL2012675	CHEMBL390096	CHEMBL611561
		CHEMBL205946	CHEMBL611090	CHEMBL3314912
		CHEMBL489175	CHEMBL33709	CHEMBL1800781
		CHEMBL3890609	CHEMBL251880	CHEMBL591926
		CHEMBL226303	CHEMBL98802	CHEMBL3912080
		CHEMBL200230	CHEMBL178662	CHEMBL449108
		CHEMBL219411	CHEMBL594255	CHEMBL271106
B2	B1	CHEMBL2088201	CHEMBL27	CHEMBL452861
		CHEMBL1082501	CHEMBL122757	CHEMBL1263
		CHEMBL266195	CHEMBL3323653	CHEMBL723
		CHEMBL1086542	CHEMBL3798017	CHEMBL1221590
	B2	CHEMBL393648	CHEMBL3323659	CHEMBL3298325
		CHEMBL440561	CHEMBL3799455	CHEMBL249336
		CHEMBL3298326	CHEMBL1083667	CHEMBL1257676
		CHEMBL1258597	CHEMBL122990	CHEMBL1221634
	B3	CHEMBL186247	CHEMBL1221586	CHEMBL1258599
		CHEMBL1258142	CHEMBL3323661	CHEMBL400049
		CHEMBL1084706	CHEMBL185262	CHEMBL3290992
		CHEMBL1257555	CHEMBL1258371	CHEMBL1258258
	B45	CHEMBL3799593	CHEMBL3290996	CHEMBL1257204
		CHEMBL464099	CHEMBL1258259	CHEMBL462313
		CHEMBL188196	CHEMBL1258707	CHEMBL226293
		CHEMBL3323662	CHEMBL3099663	CHEMBL1257438
		CHEMBL251581	CHEMBL251764	CHEMBL1094483
		CHEMBL2070834	CHEMBL1083995	CHEMBL12998
		CHEMBL679	CHEMBL3290987	CHEMBL1258940
		CHEMBL714	CHEMBL1085014	CHEMBL229614
		CHEMBL1094323	CHEMBL229401	CHEMBL1711
		CHEMBL1221801	CHEMBL1258598	CHEMBL2218907
		CHEMBL1626224	CHEMBL3290991	CHEMBL3099657
		CHEMBL1258706	CHEMBL41113	CHEMBL1258485
		CHEMBL3290979	CHEMBL3897499	CHEMBL3099658
		CHEMBL36568	CHEMBL707	CHEMBL1907082
		CHEMBL229442	CHEMBL3290977	CHEMBL269538
		CHEMBL40966	CHEMBL2070835	CHEMBL313631
		CHEMBL229615	CHEMBL52473	CHEMBL442
		CHEMBL343755	CHEMBL24	CHEMBL1632158
		CHEMBL6310	CHEMBL72168	CHEMBL208427
		CHEMBL51963	CHEMBL3290981	CHEMBL458001
		CHEMBL301707	CHEMBL1824265	CHEMBL1622248
		CHEMBL73220	CHEMBL1257323	CHEMBL1672288
		CHEMBL1824264	CHEMBL333438	CHEMBL39334
		CHEMBL495075	CHEMBL25856	CHEMBL388177
CB1	B1	CHEMBL481508	CHEMBL220360	CHEMBL336670
		CHEMBL1801344	CHEMBL199561	CHEMBL496507
		CHEMBL519288	CHEMBL2030738	CHEMBL2063237
		CHEMBL600602	CHEMBL1801340	CHEMBL108085
	B2	CHEMBL1093078	CHEMBL571330	CHEMBL521366
		CHEMBL514361	CHEMBL2180218	CHEMBL245957
		CHEMBL1081992	CHEMBL1801072	CHEMBL1087250
		CHEMBL1909846	CHEMBL3913776	CHEMBL2063242
	B3	CHEMBL1765683	CHEMBL525067	CHEMBL590346
		CHEMBL3260736	CHEMBL1215955	CHEMBL436471
		CHEMBL456341	CHEMBL518598	CHEMBL2022696
		CHEMBL3353453	CHEMBL259255	CHEMBL15772
	B45	CHEMBL571774	CHEMBL555563	CHEMBL2206858
		CHEMBL2087108	CHEMBL2177261	CHEMBL2152820
		CHEMBL2336528	CHEMBL590551	CHEMBL2152814
		CHEMBL228509	CHEMBL2030741	CHEMBL1801081
		CHEMBL157149	CHEMBL270125	CHEMBL3927601
		CHEMBL199702	CHEMBL197969	CHEMBL381791
		CHEMBL411112	CHEMBL3397517	CHEMBL346994
		CHEMBL2152806	CHEMBL1950486	CHEMBL1814467
		CHEMBL466623	CHEMBL571773	CHEMBL258242
		CHEMBL3321781	CHEMBL1081624	CHEMBL2170530
		CHEMBL1814470	CHEMBL259651	CHEMBL558785
		CHEMBL2206840	CHEMBL271988	CHEMBL1828804
		CHEMBL453847	CHEMBL576855	CHEMBL3085421
		CHEMBL490046	CHEMBL3774820	CHEMBL3967280
		CHEMBL3354398	CHEMBL3891231	CHEMBL1822935
		CHEMBL1765673	CHEMBL3943735	CHEMBL2179764
		CHEMBL2087088	CHEMBL3911245	CHEMBL3109760
		CHEMBL3221201	CHEMBL181288	CHEMBL575396
		CHEMBL3109762	CHEMBL1814462	CHEMBL200143
		CHEMBL190411	CHEMBL2414033	CHEMBL56249
		CHEMBL472165	CHEMBL484392	CHEMBL3935866
		CHEMBL1822942	CHEMBL399248	CHEMBL251003
		CHEMBL2163575	CHEMBL3596756	CHEMBL3221197
		CHEMBL160752	CHEMBL1288238	CHEMBL3586111
CCR2	B1	CHEMBL3417237	CHEMBL3650409	CHEMBL3417116
		CHEMBL1170829	CHEMBL2207082	CHEMBL3417119
		CHEMBL2207084	CHEMBL3417238	CHEMBL1924019
		CHEMBL3417113	CHEMBL3305901	CHEMBL2207081
	B2	CHEMBL3417225	CHEMBL1171786	CHEMBL2338392
		CHEMBL1924024	CHEMBL1924014	CHEMBL3650407
		CHEMBL3417117	CHEMBL3417230	CHEMBL1924013
		CHEMBL1924016	CHEMBL3650393	CHEMBL3417118
	B3	CHEMBL3650352	CHEMBL3650359	CHEMBL1924004
		CHEMBL71707	CHEMBL494019	CHEMBL3417110
		CHEMBL1171035	CHEMBL2207101	CHEMBL1169994
		CHEMBL3417220	CHEMBL1169653	CHEMBL1924020
	B45	CHEMBL53727	CHEMBL2207096	CHEMBL3650367
		CHEMBL3650357	CHEMBL3359300	CHEMBL71297
		CHEMBL299153	CHEMBL270299	CHEMBL52435
		CHEMBL53991	CHEMBL3417239	CHEMBL305470
		CHEMBL252186	CHEMBL53402	CHEMBL1170187
		CHEMBL1170391	CHEMBL3650374	CHEMBL3650350
		CHEMBL299855	CHEMBL53131	CHEMBL2207079
		CHEMBL50460	CHEMBL3650358	CHEMBL53930
		CHEMBL1924010	CHEMBL2036748	CHEMBL1924011
		CHEMBL964	CHEMBL297950	CHEMBL3650364
		CHEMBL337246	CHEMBL253424	CHEMBL337246
		CHEMBL51895	CHEMBL1924011	CHEMBL50025
		CHEMBL53779	CHEMBL54192	CHEMBL3359295
		CHEMBL300868	CHEMBL53557	CHEMBL300025
		CHEMBL3650371	CHEMBL1924010	CHEMBL193
		CHEMBL3650404	CHEMBL3650377	CHEMBL3650370
		CHEMBL49994	CHEMBL1171207	CHEMBL1924009
		CHEMBL416833	CHEMBL1171758	CHEMBL299322
		CHEMBL1171398	CHEMBL633	CHEMBL299379
		CHEMBL1171208	CHEMBL53130	CHEMBL52956
		CHEMBL2207089	CHEMBL300744	CHEMBL300455
		CHEMBL3650361	CHEMBL1169651	CHEMBL1171788
		CHEMBL51094	CHEMBL1169824	CHEMBL53819
		CHEMBL3650381	CHEMBL1381098	CHEMBL1171761
D2	B1	CHEMBL3971907	CHEMBL2298829	CHEMBL3577346
		CHEMBL219916	CHEMBL3967779	CHEMBL178803
		CHEMBL380330	CHEMBL157138	CHEMBL8946
		CHEMBL1765633	CHEMBL292187	CHEMBL1258534
	B2	CHEMBL1170095	CHEMBL164792	CHEMBL418802
		CHEMBL1081489	CHEMBL1774087	CHEMBL1257613
		CHEMBL1774084	CHEMBL2059318	CHEMBL2159491
		CHEMBL307800	CHEMBL320526	CHEMBL245764
	B3	CHEMBL3746713	CHEMBL93868	CHEMBL3676884
		CHEMBL181898	CHEMBL1087745	CHEMBL2312934
		CHEMBL2336280	CHEMBL365605	CHEMBL3234537
		CHEMBL1173778	CHEMBL2336893	CHEMBL1169728
	B45	CHEMBL3697981	CHEMBL246230	CHEMBL293225
		CHEMBL318740	CHEMBL3642749	CHEMBL144055
		CHEMBL3695417	CHEMBL3895585	CHEMBL119443
		CHEMBL244086	CHEMBL559399	CHEMBL246848
		CHEMBL396092	CHEMBL51	CHEMBL3797876
		CHEMBL245118	CHEMBL196476	CHEMBL1081203
		CHEMBL63449	CHEMBL2113351	CHEMBL562983
		CHEMBL360394	CHEMBL2420892	CHEMBL383205
		CHEMBL3695375	CHEMBL330303	CHEMBL163239
		CHEMBL231080	CHEMBL119900	CHEMBL77015
		CHEMBL93254	CHEMBL222188	CHEMBL2037531
		CHEMBL101483	CHEMBL1834257	CHEMBL1258948
		CHEMBL330470	CHEMBL67750	CHEMBL332490
		CHEMBL272478	CHEMBL68190	CHEMBL3358494
		CHEMBL161203	CHEMBL68131	CHEMBL507898
		CHEMBL104135	CHEMBL606556	CHEMBL3913100
		CHEMBL109179	CHEMBL210283	CHEMBL458220
		CHEMBL3978642	CHEMBL207566	CHEMBL2203406
		CHEMBL3763200	CHEMBL213201	CHEMBL543587
		CHEMBL3770293	CHEMBL591448	CHEMBL353220
		CHEMBL380124	CHEMBL3085215	CHEMBL556895
		CHEMBL107962	CHEMBL2112384	CHEMBL165022
		CHEMBL596271	CHEMBL1215038	CHEMBL392579
		CHEMBL146856	CHEMBL294649	CHEMBL441092
D3	B1	CHEMBL221652	CHEMBL425143	CHEMBL3899336
		CHEMBL125916	CHEMBL336971	CHEMBL126725
		CHEMBL1079639	CHEMBL1771253	CHEMBL1079481
		CHEMBL134808	CHEMBL3597635	CHEMBL127311
	B2	CHEMBL3321789	CHEMBL1771252	CHEMBL368961
		CHEMBL182652	CHEMBL109684	CHEMBL484202
		CHEMBL2113350	CHEMBL1788252	CHEMBL3774869
		CHEMBL3698019	CHEMBL3952290	CHEMBL3664838
	B3	CHEMBL3642691	CHEMBL279039	CHEMBL3323012
		CHEMBL126340	CHEMBL3890178	CHEMBL1223749
		CHEMBL3642782	CHEMBL2420782	CHEMBL240774
		CHEMBL3358511	CHEMBL1083813	CHEMBL2420891
	B45	CHEMBL269202	CHEMBL105623	CHEMBL87625
		CHEMBL3818989	CHEMBL2298811	CHEMBL355202
		CHEMBL3286429	CHEMBL247058	CHEMBL3754166
		CHEMBL97440	CHEMBL3945691	CHEMBL62624
		CHEMBL169753	CHEMBL156732	CHEMBL3084506
		CHEMBL3818710	CHEMBL150161	CHEMBL1729417
		CHEMBL425190	CHEMBL210405	CHEMBL1083815
		CHEMBL3084514	CHEMBL1258154	CHEMBL92938
		CHEMBL1170683	CHEMBL160536	CHEMBL193776
		CHEMBL298166	CHEMBL1928119	CHEMBL330108
		CHEMBL3084508	CHEMBL3818200	CHEMBL2021525
		CHEMBL238519	CHEMBL166587	CHEMBL3323660
		CHEMBL3335555	CHEMBL56	CHEMBL80645
		CHEMBL168541	CHEMBL302021	CHEMBL1259071
		CHEMBL605836	CHEMBL314285	CHEMBL353220
		CHEMBL269576	CHEMBL28607	CHEMBL2420769
		CHEMBL443843	CHEMBL3800400	CHEMBL2180637
		CHEMBL3897499	CHEMBL133969	CHEMBL595609
		CHEMBL317250	CHEMBL3335535	CHEMBL2062858
		CHEMBL3325918	CHEMBL245614	CHEMBL1779060
		CHEMBL2436555	CHEMBL64043	CHEMBL430332
		CHEMBL2205813	CHEMBL551964	CHEMBL554692
		CHEMBL423440	CHEMBL2021524	CHEMBL2432058
		CHEMBL314726	CHEMBL391661	CHEMBL392823
D4	B1	CHEMBL7617	CHEMBL210405	CHEMBL140099
		CHEMBL141845	CHEMBL91498	CHEMBL88464
		CHEMBL221600	CHEMBL184486	CHEMBL210717
		CHEMBL129757	CHEMBL2207643	CHEMBL540039
	B2	CHEMBL561763	CHEMBL1803049	CHEMBL104751
		CHEMBL146757	CHEMBL329126	CHEMBL426062
		CHEMBL3115585	CHEMBL105181	CHEMBL2443005
		CHEMBL49231	CHEMBL3818478	CHEMBL94050
	B3	CHEMBL321734	CHEMBL561262	CHEMBL319043
		CHEMBL351989	CHEMBL541270	CHEMBL1557
		CHEMBL1258270	CHEMBL2443006	CHEMBL439646
		CHEMBL210567	CHEMBL212969	CHEMBL3590079
	B45	CHEMBL77148	CHEMBL109173	CHEMBL2430441
		CHEMBL310310	CHEMBL574030	CHEMBL2111528
		CHEMBL3818935	CHEMBL311832	CHEMBL3818398
		CHEMBL3800303	CHEMBL92411	CHEMBL3588919
		CHEMBL146410	CHEMBL330470	CHEMBL318739
		CHEMBL3588982	CHEMBL241169	CHEMBL191460
		CHEMBL1928124	CHEMBL14899	CHEMBL395632
		CHEMBL89719	CHEMBL1813599	CHEMBL154508
		CHEMBL2022273	CHEMBL3318844	CHEMBL1627322
		CHEMBL394042	CHEMBL596271	CHEMBL374749
		CHEMBL113471	CHEMBL77017	CHEMBL422959
		CHEMBL467094	CHEMBL305660	CHEMBL76653
		CHEMBL400827	CHEMBL1688994	CHEMBL7430
		CHEMBL598949	CHEMBL1627316	CHEMBL56
		CHEMBL3800400	CHEMBL319650	CHEMBL198303
		CHEMBL1928247	CHEMBL106170	CHEMBL62703
		CHEMBL3588987	CHEMBL444128	CHEMBL61789
		CHEMBL3335545	CHEMBL175462	CHEMBL198174
		CHEMBL484357	CHEMBL364565	CHEMBL328114
		CHEMBL404352	CHEMBL357743	CHEMBL1627319
		CHEMBL3916231	CHEMBL609742	CHEMBL1774384
		CHEMBL242218	CHEMBL2432048	CHEMBL91
		CHEMBL194206	CHEMBL434	CHEMBL1672288
		CHEMBL1774534	CHEMBL2113386	CHEMBL3318840
delta	B1	CHEMBL2369139	CHEMBL308928	CHEMBL570000
		CHEMBL226114	CHEMBL1169585	CHEMBL1649948
		CHEMBL2338744	CHEMBL3785854	CHEMBL584941
		CHEMBL2387211	CHEMBL1649947	CHEMBL392207
	B2	CHEMBL3759489	CHEMBL518712	CHEMBL2179658
		CHEMBL2370989	CHEMBL3735298	CHEMBL573775
		CHEMBL494462	CHEMBL3262090	CHEMBL3596368
		CHEMBL226167	CHEMBL2110199	CHEMBL2179653
	B3	CHEMBL3608937	CHEMBL3951426	CHEMBL233570
		CHEMBL3409104	CHEMBL3953728	CHEMBL67428
		CHEMBL3919593	CHEMBL358104	CHEMBL38576
		CHEMBL168392	CHEMBL114123	CHEMBL440196
	B45	CHEMBL437682	CHEMBL1766038	CHEMBL2386894
		CHEMBL433508	CHEMBL375803	CHEMBL3909419
		CHEMBL115917	CHEMBL2048780	CHEMBL363822
		CHEMBL331883	CHEMBL157313	CHEMBL1824515
		CHEMBL382919	CHEMBL607319	CHEMBL571560
		CHEMBL55434	CHEMBL1081093	CHEMBL256834
		CHEMBL40993	CHEMBL2112348	CHEMBL195285
		CHEMBL2112474	CHEMBL3350133	CHEMBL56165
		CHEMBL257895	CHEMBL430441	CHEMBL2088036
		CHEMBL471543	CHEMBL3938819	CHEMBL298027
		CHEMBL568309	CHEMBL3809684	CHEMBL199684
		CHEMBL3892478	CHEMBL513990	CHEMBL402135
		CHEMBL1951700	CHEMBL3798200	CHEMBL577407
		CHEMBL1415	CHEMBL226732	CHEMBL3927338
		CHEMBL3330663	CHEMBL300023	CHEMBL3695221
		CHEMBL3319088	CHEMBL3941054	CHEMBL233535
		CHEMBL3665433	CHEMBL2022305	CHEMBL3698765
		CHEMBL2112341	CHEMBL393356	CHEMBL2112346
		CHEMBL184328	CHEMBL400036	CHEMBL582929
		CHEMBL28833	CHEMBL238156	CHEMBL260809
		CHEMBL3698821	CHEMBL322515	CHEMBL3951093
		CHEMBL3704645	CHEMBL318859	CHEMBL350943
		CHEMBL3698778	CHEMBL3809145	CHEMBL3695238
		CHEMBL258669	CHEMBL47488	CHEMBL526686
ETB	B1	CHEMBL73697	CHEMBL72358	CHEMBL311854
		CHEMBL307470	CHEMBL433106	CHEMBL308269
		CHEMBL316735	CHEMBL102405	CHEMBL73000
		CHEMBL310039	CHEMBL103201	CHEMBL306950
	B2	CHEMBL70310	CHEMBL73835	CHEMBL72217
		CHEMBL305462	CHEMBL310920	CHEMBL307045
		CHEMBL308102	CHEMBL307471	CHEMBL73042
		CHEMBL72410	CHEMBL73373	CHEMBL307384
	B3	CHEMBL418992	CHEMBL440780	CHEMBL320224
		CHEMBL275471	CHEMBL102307	CHEMBL103695
		CHEMBL100954	CHEMBL310919	CHEMBL8823
		CHEMBL318146	CHEMBL102868	CHEMBL302564
	B45	CHEMBL276288	CHEMBL175616	CHEMBL103605
		CHEMBL322996	CHEMBL25438	CHEMBL281549
		CHEMBL46311	CHEMBL303034	CHEMBL41087
		CHEMBL109648	CHEMBL8981	CHEMBL30150
		CHEMBL28963	CHEMBL25344	CHEMBL305270
		CHEMBL283610	CHEMBL282359	CHEMBL103190
		CHEMBL28863	CHEMBL8923	CHEMBL27855
		CHEMBL38537	CHEMBL431651	CHEMBL281977
		CHEMBL304721	CHEMBL274489	CHEMBL2113316
		CHEMBL29464	CHEMBL317716	CHEMBL302753
		CHEMBL112531	CHEMBL321984	CHEMBL29793
		CHEMBL101742	CHEMBL30405	CHEMBL428661
		CHEMBL282303	CHEMBL286279	CHEMBL106749
		CHEMBL303390	CHEMBL67325	CHEMBL306218
		CHEMBL149340	CHEMBL30215	CHEMBL149592
		CHEMBL267458	CHEMBL303501	CHEMBL39171
		CHEMBL284656	CHEMBL281869	CHEMBL29420
		CHEMBL319036	CHEMBL345951	CHEMBL30092
		CHEMBL147238	CHEMBL357678	CHEMBL67536
		CHEMBL282336	CHEMBL149763	CHEMBL281659
		CHEMBL29223	CHEMBL29313	CHEMBL149232
		CHEMBL359273	CHEMBL105490	CHEMBL322674
		CHEMBL148719	CHEMBL290026	CHEMBL29502
		CHEMBL148967	CHEMBL148637	CHEMBL107574
H1	B1	CHEMBL1628227	CHEMBL193639	CHEMBL2146806
		CHEMBL6437	CHEMBL1090527	CHEMBL564
		CHEMBL2146809	CHEMBL64249	CHEMBL1935438
		CHEMBL1767156	CHEMBL1767149	CHEMBL1767141
	B2	CHEMBL2208433	CHEMBL2207280	CHEMBL445
		CHEMBL728	CHEMBL549599	CHEMBL260823
		CHEMBL2207664	CHEMBL1669413	CHEMBL2207285
		CHEMBL1935447	CHEMBL21731	CHEMBL654
	B3	CHEMBL186125	CHEMBL1940414	CHEMBL558339
		CHEMBL2158814	CHEMBL2158821	CHEMBL1222623
		CHEMBL2158774	CHEMBL2171029	CHEMBL440512
		CHEMBL2207660	CHEMBL2171215	CHEMBL2158773
	B45	CHEMBL3818805	CHEMBL292275	CHEMBL3899822
		CHEMBL1946125	CHEMBL476108	CHEMBL457957
		CHEMBL304714	CHEMBL272899	CHEMBL3752576
		CHEMBL1455766	CHEMBL451	CHEMBL236610
		CHEMBL2207642	CHEMBL1669410	CHEMBL1767142
		CHEMBL3358509	CHEMBL3357045	CHEMBL105483
		CHEMBL3357043	CHEMBL271909	CHEMBL61396
		CHEMBL2171049	CHEMBL3922367	CHEMBL478617
		CHEMBL105762	CHEMBL59715	CHEMBL1946126
		CHEMBL476935	CHEMBL320178	CHEMBL1910383
		CHEMBL2207641	CHEMBL2391541	CHEMBL442456
		CHEMBL2179217	CHEMBL2158833	CHEMBL3967709
		CHEMBL62903	CHEMBL3753962	CHEMBL1201207
		CHEMBL555146	CHEMBL60620	CHEMBL2031877
		CHEMBL287671	CHEMBL594721	CHEMBL400224
		CHEMBL272695	CHEMBL2207638	CHEMBL237087
		CHEMBL10602	CHEMBL155328	CHEMBL556782
		CHEMBL3805220	CHEMBL25688	CHEMBL255621
		CHEMBL271844	CHEMBL107162	CHEMBL272480
		CHEMBL430368	CHEMBL404404	CHEMBL403804
		CHEMBL431172	CHEMBL271083	CHEMBL319000
		CHEMBL3804837	CHEMBL2207639	CHEMBL3752270
		CHEMBL104618	CHEMBL240395	CHEMBL3221637
		CHEMBL536991	CHEMBL401777	CHEMBL90997
kappa	B1	CHEMBL301701	CHEMBL415284	CHEMBL435132
		CHEMBL2180639	CHEMBL1766041	CHEMBL1790045
		CHEMBL518712	CHEMBL60869	CHEMBL1766024
		CHEMBL87514	CHEMBL201971	CHEMBL3085528
	B2	CHEMBL397276	CHEMBL1766044	CHEMBL1818334
		CHEMBL576273	CHEMBL1818341	CHEMBL170384
		CHEMBL2048769	CHEMBL1921850	CHEMBL592
		CHEMBL539685	CHEMBL2046467	CHEMBL195787
	B3	CHEMBL469188	CHEMBL27716	CHEMBL410907
		CHEMBL385392	CHEMBL1808302	CHEMBL1818231
		CHEMBL516389	CHEMBL1642746	CHEMBL1081093
		CHEMBL480426	CHEMBL1223951	CHEMBL1818237
	B45	CHEMBL3735756	CHEMBL494265	CHEMBL187635
		CHEMBL2386821	CHEMBL570000	CHEMBL559569
		CHEMBL324392	CHEMBL514606	CHEMBL510201
		CHEMBL2180641	CHEMBL287726	CHEMBL592300
		CHEMBL1642740	CHEMBL474091	CHEMBL291901
		CHEMBL550063	CHEMBL1642753	CHEMBL233143
		CHEMBL3409109	CHEMBL199871	CHEMBL3665419
		CHEMBL202327	CHEMBL3084634	CHEMBL3409112
		CHEMBL3695263	CHEMBL513136	CHEMBL3698756
		CHEMBL2387189	CHEMBL3698856	CHEMBL218506
		CHEMBL3409119	CHEMBL3287468	CHEMBL202139
		CHEMBL233535	CHEMBL48420	CHEMBL237716
		CHEMBL1808299	CHEMBL3904569	CHEMBL448155
		CHEMBL495548	CHEMBL361926	CHEMBL104
		CHEMBL411	CHEMBL2413795	CHEMBL393985
		CHEMBL231874	CHEMBL184260	CHEMBL427395
		CHEMBL187743	CHEMBL3907688	CHEMBL240870
		CHEMBL41550	CHEMBL102497	CHEMBL495954
		CHEMBL3889570	CHEMBL592301	CHEMBL3809650
		CHEMBL570448	CHEMBL238281	CHEMBL238305
		CHEMBL211210	CHEMBL412301	CHEMBL2386895
		CHEMBL29808	CHEMBL1814702	CHEMBL113684
		CHEMBL229018	CHEMBL117321	CHEMBL1080389
		CHEMBL585536	CHEMBL271322	CHEMBL599175
M1	B1	CHEMBL2023764	CHEMBL219786	CHEMBL143434
		CHEMBL3084662	CHEMBL142184	CHEMBL143466
		CHEMBL143468	CHEMBL2042404	CHEMBL71431
		CHEMBL375969	CHEMBL3084679	CHEMBL376057
	B2	CHEMBL2106570	CHEMBL420008	CHEMBL312085
		CHEMBL569760	CHEMBL26505	CHEMBL2377269
		CHEMBL540982	CHEMBL2042552	CHEMBL66400
		CHEMBL356505	CHEMBL3084658	CHEMBL394137
	B3	CHEMBL168145	CHEMBL27673	CHEMBL234257
		CHEMBL147554	CHEMBL74352	CHEMBL519609
		CHEMBL336933	CHEMBL269117	CHEMBL378872
		CHEMBL146249	CHEMBL559557	CHEMBL451821
	B45	CHEMBL363895	CHEMBL14	CHEMBL167223
		CHEMBL2114067	CHEMBL3985877	CHEMBL398043
		CHEMBL2206334	CHEMBL91	CHEMBL72956
		CHEMBL302720	CHEMBL145081	CHEMBL3964512
		CHEMBL106219	CHEMBL3765426	CHEMBL1113
		CHEMBL354934	CHEMBL569212	CHEMBL355769
		CHEMBL2312382	CHEMBL69383	CHEMBL3975147
		CHEMBL499519	CHEMBL3899125	CHEMBL169469
		CHEMBL70848	CHEMBL311795	CHEMBL3085030
		CHEMBL359197	CHEMBL3577945	CHEMBL69452
		CHEMBL352618	CHEMBL2112955	CHEMBL3983937
		CHEMBL74736	CHEMBL2312383	CHEMBL1935445
		CHEMBL69904	CHEMBL105160	CHEMBL306462
		CHEMBL550818	CHEMBL195927	CHEMBL239866
		CHEMBL569270	CHEMBL2312350	CHEMBL2312388
		CHEMBL2311978	CHEMBL2312375	CHEMBL2311983
		CHEMBL196598	CHEMBL1092377	CHEMBL104210
		CHEMBL279520	CHEMBL2441756	CHEMBL1559535
		CHEMBL1088899	CHEMBL53463	CHEMBL94772
		CHEMBL287671	CHEMBL2312381	CHEMBL1092662
		CHEMBL593685	CHEMBL106224	CHEMBL1411979
		CHEMBL2441761	CHEMBL2441751	CHEMBL282829
		CHEMBL239655	CHEMBL94454	CHEMBL1088900
		CHEMBL2312386	CHEMBL275914	CHEMBL278129
M2	B1	CHEMBL370232	CHEMBL3629360	CHEMBL174070
		CHEMBL352739	CHEMBL165035	CHEMBL76164
		CHEMBL335542	CHEMBL305693	CHEMBL287868
		CHEMBL376897	CHEMBL167816	CHEMBL12098
	B2	CHEMBL92110	CHEMBL353842	CHEMBL355854
		CHEMBL73341	CHEMBL167838	CHEMBL222634
		CHEMBL200693	CHEMBL169565	CHEMBL234258
		CHEMBL353465	CHEMBL2021477	CHEMBL311054
	B3	CHEMBL166385	CHEMBL398043	CHEMBL219118
		CHEMBL2424680	CHEMBL583027	CHEMBL380583
		CHEMBL286008	CHEMBL2111540	CHEMBL83982
		CHEMBL284137	CHEMBL554916	CHEMBL3354066
	B45	CHEMBL82859	CHEMBL168145	CHEMBL322251
		CHEMBL354934	CHEMBL2426672	CHEMBL106224
		CHEMBL170088	CHEMBL199981	CHEMBL436492
		CHEMBL224783	CHEMBL2432039	CHEMBL172272
		CHEMBL171102	CHEMBL2205836	CHEMBL259344
		CHEMBL151938	CHEMBL524061	CHEMBL443267
		CHEMBL569212	CHEMBL354841	CHEMBL357444
		CHEMBL1191560	CHEMBL12268	CHEMBL223079
		CHEMBL346194	CHEMBL352596	CHEMBL239436
		CHEMBL3298986	CHEMBL177040	CHEMBL1713967
		CHEMBL273439	CHEMBL667	CHEMBL478226
		CHEMBL376781	CHEMBL519609	CHEMBL11947
		CHEMBL138502	CHEMBL2092736	CHEMBL302720
		CHEMBL105160	CHEMBL357404	CHEMBL595022
		CHEMBL149769	CHEMBL420662	CHEMBL424214
		CHEMBL2426680	CHEMBL197973	CHEMBL2032049
		CHEMBL451542	CHEMBL2426686	CHEMBL220553
		CHEMBL144737	CHEMBL2092820	CHEMBL1559535
		CHEMBL105122	CHEMBL420255	CHEMBL145608
		CHEMBL267014	CHEMBL3359597	CHEMBL1258452
		CHEMBL460470	CHEMBL227429	CHEMBL145301
		CHEMBL147105	CHEMBL144580	CHEMBL553155
		CHEMBL352779	CHEMBL2432043	CHEMBL343242
		CHEMBL257174	CHEMBL402207	CHEMBL2426687
M4	B1	CHEMBL1123	CHEMBL222259	CHEMBL376057
		CHEMBL1490	CHEMBL3545181	CHEMBL3629360
		CHEMBL1464005	CHEMBL76897	CHEMBL1231
		CHEMBL3354068	CHEMBL219786	CHEMBL143469
	B2	CHEMBL1626	CHEMBL3354070	CHEMBL105122
		CHEMBL106218	CHEMBL553058	CHEMBL2042553
		CHEMBL376255	CHEMBL1909073	CHEMBL59898
		CHEMBL2377269	CHEMBL2107687	CHEMBL216927
	B3	CHEMBL576707	CHEMBL136027	CHEMBL105160
		CHEMBL104803	CHEMBL479	CHEMBL21536
		CHEMBL571341	CHEMBL214029	CHEMBL216928
		CHEMBL438822	CHEMBL490	CHEMBL657
	B45	CHEMBL69452	CHEMBL172233	CHEMBL168707
		CHEMBL568775	CHEMBL107679	CHEMBL285898
		CHEMBL440138	CHEMBL240024	CHEMBL240022
		CHEMBL576663	CHEMBL556390	CHEMBL294273
		CHEMBL85190	CHEMBL608151	CHEMBL82754
		CHEMBL588119	CHEMBL285802	CHEMBL167223
		CHEMBL219118	CHEMBL633	CHEMBL524061
		CHEMBL3770870	CHEMBL215894	CHEMBL241102
		CHEMBL1258223	CHEMBL726	CHEMBL211976
		CHEMBL7568	CHEMBL555146	CHEMBL352375
		CHEMBL716	CHEMBL499519	CHEMBL2031737
		CHEMBL257643	CHEMBL17045	CHEMBL1493369
		CHEMBL458416	CHEMBL2312346	CHEMBL451335
		CHEMBL278129	CHEMBL280684	CHEMBL313631
		CHEMBL257547	CHEMBL2205829	CHEMBL2335158
		CHEMBL380759	CHEMBL355392	CHEMBL2205816
		CHEMBL1306	CHEMBL2432040	CHEMBL2424668
		CHEMBL220553	CHEMBL2377385	CHEMBL2432042
		CHEMBL85	CHEMBL2432052	CHEMBL3104091
		CHEMBL227429	CHEMBL257174	CHEMBL461709
		CHEMBL2042402	CHEMBL372453	CHEMBL390842
		CHEMBL291562	CHEMBL3351104	CHEMBL594801
		CHEMBL3350063	CHEMBL2312352	CHEMBL3770360
		CHEMBL450729	CHEMBL440138	CHEMBL2205362
NOP	B1	CHEMBL233326	CHEMBL232477	CHEMBL2112345
		CHEMBL3236485	CHEMBL2204353	CHEMBL513136
		CHEMBL3236488	CHEMBL2088059	CHEMBL3326228
		CHEMBL2064160	CHEMBL3236487	CHEMBL400035
	B2	CHEMBL75676	CHEMBL474687	CHEMBL27699
		CHEMBL3951319	CHEMBL77324	CHEMBL240215
		CHEMBL212525	CHEMBL317152	CHEMBL3084669
		CHEMBL3325962	CHEMBL393807	CHEMBL139934
	B3	CHEMBL184381	CHEMBL362160	CHEMBL3665435
		CHEMBL3581750	CHEMBL139566	CHEMBL472676
		CHEMBL258897	CHEMBL140580	CHEMBL324635
		CHEMBL3647963	CHEMBL499169	CHEMBL3967435
	B45	CHEMBL325774	CHEMBL1081374	CHEMBL3262088
		CHEMBL3786946	CHEMBL3084538	CHEMBL109803
		CHEMBL2064142	CHEMBL3665428	CHEMBL281322
		CHEMBL97979	CHEMBL1834416	CHEMBL3262091
		CHEMBL186938	CHEMBL3325883	CHEMBL230033
		CHEMBL474708	CHEMBL1081375	CHEMBL291901
		CHEMBL3959501	CHEMBL3665436	CHEMBL3325745
		CHEMBL234581	CHEMBL3665429	CHEMBL106235
		CHEMBL264288	CHEMBL3349268	CHEMBL324895
		CHEMBL181342	CHEMBL3349266	CHEMBL2064147
		CHEMBL3325749	CHEMBL46516	CHEMBL299660
		CHEMBL322515	CHEMBL270133	CHEMBL1783823
		CHEMBL466438	CHEMBL211094	CHEMBL393675
		CHEMBL377033	CHEMBL231664	CHEMBL361926
		CHEMBL100574	CHEMBL228736	CHEMBL3670298
		CHEMBL233820	CHEMBL320342	CHEMBL611930
		CHEMBL437742	CHEMBL184689	CHEMBL187907
		CHEMBL187743	CHEMBL210770	CHEMBL184864
		CHEMBL3961206	CHEMBL228738	CHEMBL106785
		CHEMBL3581762	CHEMBL3932117	CHEMBL3262550
		CHEMBL3144472	CHEMBL1783824	CHEMBL110138
		CHEMBL3665437	CHEMBL378453	CHEMBL3262552
		CHEMBL109509	CHEMBL593214	CHEMBL1783828
		CHEMBL322717	CHEMBL182131	CHEMBL320582
OX1	B1	CHEMBL3394847	CHEMBL3260824	CHEMBL1170178
		CHEMBL1083657	CHEMBL1170803	CHEMBL1830961
		CHEMBL3260834	CHEMBL1083659	CHEMBL1172520
		CHEMBL3260832	CHEMBL1830968	CHEMBL3260835
	B2	CHEMBL3739451	CHEMBL3545367	CHEMBL3634015
		CHEMBL3691851	CHEMBL3669030	CHEMBL2435411
		CHEMBL3704939	CHEMBL2107822	CHEMBL3663390
		CHEMBL429130	CHEMBL3260825	CHEMBL2425784
	B3	CHEMBL3670628	CHEMBL2435400	CHEMBL3585954
		CHEMBL3663510	CHEMBL3669467	CHEMBL3585942
		CHEMBL3649106	CHEMBL3663572	CHEMBL3669024
		CHEMBL3659191	CHEMBL3663502	CHEMBL3663415
	B45	CHEMBL3670578	CHEMBL3669491	CHEMBL3670564
		CHEMBL3586430	CHEMBL3649236	CHEMBL3652468
		CHEMBL3704965	CHEMBL3669508	CHEMBL3665618
		CHEMBL3649199	CHEMBL2385134	CHEMBL3665619
		CHEMBL404397	CHEMBL3669051	CHEMBL3669573
		CHEMBL3663471	CHEMBL3585936	CHEMBL3670630
		CHEMBL3704928	CHEMBL3665630	CHEMBL3669560
		CHEMBL3426150	CHEMBL3649126	CHEMBL3649057
		CHEMBL3691816	CHEMBL3586426	CHEMBL3585949
		CHEMBL3663449	CHEMBL3652448	CHEMBL3672933
		CHEMBL184936	CHEMBL3649092	CHEMBL3426138
		CHEMBL3663569	CHEMBL2435397	CHEMBL2413512
		CHEMBL3646167	CHEMBL3649050	CHEMBL3665635
		CHEMBL3663444	CHEMBL3343260	CHEMBL3663435
		CHEMBL3649097	CHEMBL3670629	CHEMBL1271877
		CHEMBL3652457	CHEMBL3670567	CHEMBL1272205
		CHEMBL3670534	CHEMBL3669570	CHEMBL3652523
		CHEMBL3646175	CHEMBL3652508	CHEMBL3649090
		CHEMBL3649175	CHEMBL3663443	CHEMBL3649178
		CHEMBL3669486	CHEMBL3649239	CHEMBL3669463
		CHEMBL3950755	CHEMBL3951785	CHEMBL2413513
		CHEMBL3642136	CHEMBL3649192	CHEMBL3652438
		CHEMBL3670547	CHEMBL3586417	CHEMBL3585934
		CHEMBL3649158	CHEMBL3669532	CHEMBL3670606
OX2	B1	CHEMBL429130	CHEMBL2435411	CHEMBL3260835
		CHEMBL3655711	CHEMBL3099899	CHEMBL3338856
		CHEMBL445161	CHEMBL3545367	CHEMBL3741474
		CHEMBL3394842	CHEMBL1083041	CHEMBL3099893
	B2	CHEMBL3652469	CHEMBL3394831	CHEMBL3652514
		CHEMBL3585940	CHEMBL3672931	CHEMBL3585956
		CHEMBL3642129	CHEMBL2385132	CHEMBL2435409
		CHEMBL3585942	CHEMBL3343259	CHEMBL3099895
	B3	CHEMBL3670531	CHEMBL1830962	CHEMBL3670595
		CHEMBL3670528	CHEMBL3670542	CHEMBL3669473
		CHEMBL3646156	CHEMBL3649077	CHEMBL3343253
		CHEMBL3652472	CHEMBL3585950	CHEMBL3099884
	B45	CHEMBL3663424	CHEMBL3663554	CHEMBL3665649
		CHEMBL3670553	CHEMBL3669444	CHEMBL3670573
		CHEMBL291536	CHEMBL3665623	CHEMBL3649049
		CHEMBL3670612	CHEMBL3649034	CHEMBL3652439
		CHEMBL185080	CHEMBL3597968	CHEMBL3924149
		CHEMBL3663528	CHEMBL3669526	CHEMBL2413367
		CHEMBL3663571	CHEMBL3639580	CHEMBL3649133
		CHEMBL3663572	CHEMBL3597965	CHEMBL3669461
		CHEMBL3663430	CHEMBL3663395	CHEMBL3669459
		CHEMBL3652475	CHEMBL3665639	CHEMBL184303
		CHEMBL3659207	CHEMBL3669458	CHEMBL3235259
		CHEMBL3669516	CHEMBL3659206	CHEMBL3669575
		CHEMBL3649192	CHEMBL3343241	CHEMBL3652485
		CHEMBL3663473	CHEMBL3665628	CHEMBL3663478
		CHEMBL3649153	CHEMBL3954099	CHEMBL1334465
		CHEMBL3652493	CHEMBL3972394	CHEMBL3663439
		CHEMBL3922456	CHEMBL3649207	CHEMBL3691807
		CHEMBL3646190	CHEMBL3669511	CHEMBL3669040
		CHEMBL3691825	CHEMBL3663505	CHEMBL3669006
		CHEMBL3649208	CHEMBL3659229	CHEMBL3670551
		CHEMBL3670597	CHEMBL1271761	CHEMBL3663452
		CHEMBL3649076	CHEMBL3663417	CHEMBL3649149
		CHEMBL3663545	CHEMBL3979157	CHEMBL3691828
		CHEMBL3649183	CHEMBL3691824	CHEMBL3911086
P2Y1	B1	CHEMBL3958698	CHEMBL3263059	CHEMBL2401804
		CHEMBL2401857	CHEMBL3961320	CHEMBL3952542
		CHEMBL3975389	CHEMBL2333772	CHEMBL2393200
		CHEMBL3964813	CHEMBL3897234	CHEMBL3896118
	B2	CHEMBL3287047	CHEMBL3964440	CHEMBL3901507
		CHEMBL3287043	CHEMBL3924797	CHEMBL3947595
		CHEMBL3287049	CHEMBL3954912	CHEMBL3930322
		CHEMBL3925340	CHEMBL2333766	CHEMBL2112864
	B3	CHEMBL2333760	CHEMBL2393213	CHEMBL3983590
		CHEMBL2393195	CHEMBL3961084	CHEMBL3103629
		CHEMBL2393210	CHEMBL3915938	CHEMBL2381903
		CHEMBL2393196	CHEMBL3263066	CHEMBL3955518
	B45	CHEMBL3092615	CHEMBL1170328	CHEMBL401657
		CHEMBL454913	CHEMBL2333350	CHEMBL3103628
		CHEMBL2112007	CHEMBL255308	CHEMBL2112861
		CHEMBL2401802	CHEMBL3104629	CHEMBL461532
		CHEMBL2333358	CHEMBL461326	CHEMBL2381897
		CHEMBL2393204	CHEMBL2393208	CHEMBL3092617
		CHEMBL375682	CHEMBL2333763	CHEMBL403879
		CHEMBL2401862	CHEMBL2333359	CHEMBL462367
		CHEMBL2381893	CHEMBL402597	CHEMBL1169909
		CHEMBL404869	CHEMBL402563	CHEMBL2381906
		CHEMBL3104631	CHEMBL226807	CHEMBL461325
		CHEMBL257560	CHEMBL3092621	CHEMBL255726
		CHEMBL258429	CHEMBL2333764	CHEMBL3092624
		CHEMBL2071530	CHEMBL2381892	CHEMBL255454
		CHEMBL2333758	CHEMBL2401854	CHEMBL3104627
		CHEMBL2393197	CHEMBL255278	CHEMBL258234
		CHEMBL256944	CHEMBL255455	CHEMBL3104626
		CHEMBL3092623	CHEMBL402793	CHEMBL2071537
		CHEMBL2333769	CHEMBL2381890	CHEMBL428431
		CHEMBL256943	CHEMBL2071532	CHEMBL255252
		CHEMBL3092616	CHEMBL2071536	CHEMBL2393194
		CHEMBL255505	CHEMBL255093	CHEMBL2393218
		CHEMBL2172277	CHEMBL226857	CHEMBL1518422
		CHEMBL3092626	CHEMBL257136	CHEMBL430029
P2Y12	B1	CHEMBL568059	CHEMBL601695	CHEMBL565974
		CHEMBL571599	CHEMBL567133	CHEMBL566913
		CHEMBL601698	CHEMBL569914	CHEMBL2172149
		CHEMBL601696	CHEMBL567561	CHEMBL567915
	B2	CHEMBL596961	CHEMBL571584	CHEMBL565363
		CHEMBL600370	CHEMBL570155	CHEMBL600573
		CHEMBL569915	CHEMBL579330	CHEMBL603148
		CHEMBL590008	CHEMBL592678	CHEMBL570238
	B3	CHEMBL590259	CHEMBL598386	CHEMBL569053
		CHEMBL591226	CHEMBL603866	CHEMBL569771
		CHEMBL563183	CHEMBL569913	CHEMBL398435
		CHEMBL554782	CHEMBL592409	CHEMBL598374
	B45	CHEMBL566447	CHEMBL2172264	CHEMBL2172134
		CHEMBL557062	CHEMBL569908	CHEMBL599606
		CHEMBL541742	CHEMBL598816	CHEMBL599422
		CHEMBL605565	CHEMBL2172142	CHEMBL556446
		CHEMBL599020	CHEMBL585693	CHEMBL2172266
		CHEMBL597380	CHEMBL2172139	CHEMBL559259
		CHEMBL2172145	CHEMBL2172158	CHEMBL568127
		CHEMBL605968	CHEMBL551619	CHEMBL2172137
		CHEMBL2172280	CHEMBL496620	CHEMBL2172138
		CHEMBL568567	CHEMBL565840	CHEMBL2172159
		CHEMBL591536	CHEMBL2172279	CHEMBL2172284
		CHEMBL223344	CHEMBL561692	CHEMBL2172130
		CHEMBL495796	CHEMBL596963	CHEMBL600191
		CHEMBL445413	CHEMBL496229	CHEMBL597766
		CHEMBL499580	CHEMBL498225	CHEMBL562546
		CHEMBL498038	CHEMBL597351	CHEMBL598381
		CHEMBL1440	CHEMBL40275	CHEMBL605563
		CHEMBL599991	CHEMBL2333767	CHEMBL498223
		CHEMBL496012	CHEMBL597158	CHEMBL559689
		CHEMBL549307	CHEMBL498224	CHEMBL2333774
		CHEMBL599202	CHEMBL2333770	CHEMBL53463
		CHEMBL496022	CHEMBL58	CHEMBL598388
		CHEMBL522725	CHEMBL522053	CHEMBL566661
		CHEMBL605773	CHEMBL589528	CHEMBL271673
Y1	B1	CHEMBL434467	CHEMBL1771259	CHEMBL3746386
		CHEMBL3746851	CHEMBL345581	CHEMBL348119
		CHEMBL346243	CHEMBL157661	CHEMBL329536
		CHEMBL3746870	CHEMBL346242	CHEMBL155802
	B2	CHEMBL433734	CHEMBL155925	CHEMBL3746796
		CHEMBL262904	CHEMBL1774206	CHEMBL44246
		CHEMBL331937	CHEMBL1771261	CHEMBL3747224
		CHEMBL121799	CHEMBL1771260	CHEMBL61532
	B3	CHEMBL127962	CHEMBL538380	CHEMBL559045
		CHEMBL515095	CHEMBL145396	CHEMBL121636
		CHEMBL1774217	CHEMBL561332	CHEMBL314123
		CHEMBL2046865	CHEMBL90497	CHEMBL1774207
	B45	CHEMBL557932	CHEMBL1771263	CHEMBL91738
		CHEMBL328460	CHEMBL343313	CHEMBL1080301
		CHEMBL141442	CHEMBL1080826	CHEMBL343399
		CHEMBL2440935	CHEMBL551608	CHEMBL1224000
		CHEMBL340209	CHEMBL1223987	CHEMBL88871
		CHEMBL356585	CHEMBL88805	CHEMBL1774215
		CHEMBL145510	CHEMBL327410	CHEMBL88450
		CHEMBL1081469	CHEMBL53657	CHEMBL1076276
		CHEMBL1081732	CHEMBL1079927	CHEMBL145438
		CHEMBL2440937	CHEMBL144262	CHEMBL564810
		CHEMBL143014	CHEMBL338296	CHEMBL1081181
		CHEMBL1242923	CHEMBL301150	CHEMBL1080101
		CHEMBL141879	CHEMBL89297	CHEMBL1079609
		CHEMBL93324	CHEMBL330522	CHEMBL561594
		CHEMBL1287953	CHEMBL48777	CHEMBL1079388
		CHEMBL145501	CHEMBL2440905	CHEMBL145392
		CHEMBL2440909	CHEMBL51138	CHEMBL145289
		CHEMBL539730	CHEMBL314531	CHEMBL316291
		CHEMBL341908	CHEMBL1079441	CHEMBL359174
		CHEMBL1076234	CHEMBL314520	CHEMBL301126
		CHEMBL431403	CHEMBL146606	CHEMBL1080617
		CHEMBL1209347	CHEMBL1079440	CHEMBL299879
		CHEMBL343413	CHEMBL1080102	CHEMBL1080289
		CHEMBL359207	CHEMBL142427	CHEMBL124936

## Sheet: PDB codes
Crystal structures of receptor used in this study.
Receptor	PDB ID	Resolution [A]
5-HT1B	4IAR	2.7
5-HT2B	4IB4	2.7
5-HT2C	6BQH	2.7
A1	5UEN	3.2
A2A	5NM4	1.7
B2	2RH1	2.4
CB1	5U09	2.6
CCR2	5T1A	2.8
D2	6CM4	2.9
D3	3PBL	2.9
D4	5WIU	2
delta	4N6H	1.8
ETB	5X93	2.2
H1	3RZE	3.1
kappa	4DJH	2.9
M1	5CXV	2.7
M2	3UIN	2.7
M4	5DSQ	1.5
NOP	5DHG	3
OX1	4ZJ8	2.8
OX2	5WQC	2
P2Y1	4XNV	2.2
P2Y12	4PXZ	2.5
Y1	5ZBQ	2.7

## Sheet: training
					ORIGINAL
	EF					%A					% SR					Ht					Na					Bi					N
	B1	B2	B3	B123	B45	B1	B2	B3	B123	B45	B1	B2	B3	B123	B45	B1	B2	B3	B123	B45	B1	B2	B3	B123	B45	B1	B2	B3	B123	B45
gpcr_whole	1.10769	1.00945	1.06931	1.10036	1.08703	6.66667	22.549	37.5	69.7917	39.7569	11.5385	11.9171	11.8812	36.6788	72.4684	6	23	36	201	229	52	193	303	548	316	90	102	96	288	576	864
serotonin	0	1.28571	1.17391	0.981818	0.990566	0	33.3333	25	50	48.6111	0	14.2857	13.0435	32.7273	66.0377	0	4	3	18	35	4	28	23	55	53	12	12	12	36	72	108
5-HT1B	0	1.42105	1.5	1.11111	1.16667	0	75	25	83.3333	29.1667	0	15.7895	16.6667	37.037	77.7778	0	3	1	10	7	2	19	6	27	9	4	4	4	12	24	36
5-HT2B	0	0	1.28571	1	1	0	0	25	33.3333	66.6667	0	0	14.2857	33.3333	66.6667	0	0	1	4	16	2	3	7	12	24	4	4	4	12	24	36
5-HT2C	0	1.5	0.9	0.75	0.9	0	25	25	33.3333	50	0	16.6667	10	25	60	0	1	1	4	12	0	6	10	16	20	4	4	4	12	24	36
dopamine	0	0.964286	0.642857	1.06849	1.07143	0	25	25	72.2222	34.7222	0	10.7143	7.14286	35.6164	71.4286	0	3	3	26	25	3	28	42	73	35	12	12	12	36	72	108
D2	0	1.28571	0	1	1	0	50	0	75	25	0	14.2857	0	33.3333	66.6667	0	2	0	9	6	3	14	10	27	9	4	4	4	12	24	36
D3	0	1.5	0.5625	1.09091	1.07143	0	25	25	66.6667	41.6667	0	16.6667	6.25	36.3636	71.4286	0	1	1	8	10	0	6	16	22	14	4	4	4	12	24	36
D4	0	0	1.125	1.125	1.125	0	0	50	75	37.5	0	0	12.5	37.5	75	0	0	2	9	9	0	8	16	24	12	4	4	4	12	24	36
muscarinic	0	1.5	1.65789	1.26316	1.14706	0	25	58.3333	66.6667	54.1667	0	16.6667	18.4211	42.1053	76.4706	0	3	7	24	39	1	18	38	57	51	12	12	12	36	72	108
M1	0	1.28571	0.9	1.05882	1.02632	0	25	25	50	54.1667	0	14.2857	10	35.2941	68.4211	0	1	1	6	13	0	7	10	17	19	4	4	4	12	24	36
M2	0	2.57143	1.89474	1.15385	1.2	0	50	100	83.3333	33.3333	0	28.5714	21.0526	38.4615	80	0	2	4	10	8	0	7	19	26	10	4	4	4	12	24	36
M4	0	0	2	1.71429	1.22727	0	0	50	66.6667	75	0	0	22.2222	57.1429	81.8182	0	0	2	8	18	1	4	9	14	22	4	4	4	12	24	36
opioid	0	1.5	1.17391	1.07463	1.06098	0	25	50	66.6667	40.2778	0	16.6667	13.0435	35.8209	70.7317	0	3	6	24	29	3	18	46	67	41	12	12	12	36	72	108
delta	0	3.6	1.2	1	1	0	50	50	58.3333	41.6667	0	40	13.3333	33.3333	66.6667	0	2	2	7	10	1	5	15	21	15	4	4	4	12	24	36
kappa	0	0.818182	0.818182	1	1	0	25	25	66.6667	33.3333	0	9.09091	9.09091	33.3333	66.6667	0	1	1	8	8	2	11	11	24	12	4	4	4	12	24	36
NOP	0	0	1.35	1.22727	1.17857	0	0	75	75	45.8333	0	0	15	40.9091	78.5714	0	0	3	9	11	0	2	20	22	14	4	4	4	12	24	36
																															0
			average for proteins			0	27.0833	39.5833	63.8889	44.4444	0	12.9464	12.5335	36.7535	71.6403
					NEW
	EF					%A					% SR					Ht					Na					Bi					N
	B1	B2	B3	B123	B45	B1	B2	B3	B123	B45	B1	B2	B3	B123	B45	B1	B2	B3	B123	B45	B1	B2	B3	B123	B45	B1	B2	B3	B123	B45
gpcr_whole	2.92174	1.69412	2.45455	1.14444	1.12037	7.77778	0.980392	3.125	71.5278	42.0139	30.4348	20	27.2727	38.1481	74.6914	7	1	3	206	242	23	5	11	540	324	90	102	96	288	576	864
serotonin	3.6	2.7	3	1.32558	1.10769	16.6667	25	25	52.7778	66.6667	40	30	33.3333	44.186	73.8462	2	3	3	19	48	5	10	9	43	65	12	12	12	36	72	108
5-HT1B	3.6	3	3	1.83333	1.41667	50	25	50	91.6667	70.8333	40	33.3333	33.3333	61.1111	94.4444	2	1	2	11	17	5	3	6	18	18	4	4	4	12	24	36
5-HT2B	4.5	3	3	1.63636	1.14	25	25	25	50	79.1667	50	33.3333	33.3333	54.5455	76	1	1	1	6	19	2	3	3	11	25	4	4	4	12	24	36
5-HT2C	3	9	3	1.5	1.15909	50	25	25	58.3333	70.8333	33.3333	100	33.3333	50	77.2727	2	1	1	7	17	6	1	3	14	22	4	4	4	12	24	36
dopamine	2.7	2.57143	2	1.36364	1.125	25	16.6667	16.6667	55.5556	66.6667	30	28.5714	22.2222	45.4545	75	3	2	2	20	48	10	7	9	44	64	12	12	12	36	72	108
D2	3	3	4.5	1.65	1.40625	75	25	50	91.6667	62.5	33.3333	33.3333	50	55	93.75	3	1	2	11	15	9	3	4	20	16	4	4	4	12	24	36
D3	4.5	4.5	4.5	1.92857	1.29545	75	50	50	75	79.1667	50	50	50	64.2857	86.3636	3	2	2	9	19	6	4	4	14	22	4	4	4	12	24	36
D4	6	3	4.5	1.71429	1.22727	50	25	25	66.6667	75	66.6667	33.3333	50	57.1429	81.8182	2	1	1	8	18	3	3	2	14	22	4	4	4	12	24	36
muscarinic	1.28571	1.42105	1.8	1.38158	1.45312	50	25	25	97.2222	43.0556	14.2857	15.7895	20	46.0526	96.875	6	3	3	35	31	42	19	15	76	32	12	12	12	36	72	108
M1	2.25	6	2.25	1.38462	1.5	25	50	25	100	41.6667	25	66.6667	25	46.1538	100	1	2	1	12	10	4	3	4	26	10	4	4	4	12	24	36
M2	1.5	4.5	3.85714	1.44	1.5	75	25	75	100	45.8333	16.6667	50	42.8571	48	100	3	1	3	12	11	18	2	7	25	11	4	4	4	12	24	36
M4	3.6	4.5	9	1.90909	1.2	50	50	25	58.3333	83.3333	40	50	100	63.6364	80	2	2	1	7	20	5	4	1	11	25	4	4	4	12	24	36
opioid	1.63636	4.5	2.57143	1.35714	1.11364	33.3333	16.6667	16.6667	52.7778	68.0556	18.1818	50	28.5714	45.2381	74.2424	4	2	2	19	49	22	4	7	42	66	12	12	12	36	72	108
delta	3.6	4.5	4.5	1.90909	1.2	50	25	50	58.3333	83.3333	40	50	50	63.6364	80	2	1	2	7	20	5	2	4	11	25	4	4	4	12	24	36
kappa	1.8	4.5	3	1.41176	1.18421	50	25	25	66.6667	62.5	20	50	33.3333	47.0588	78.9474	2	1	1	8	15	10	2	3	17	19	4	4	4	12	24	36
NOP	2.7	4.5	9	1.5	1.125	75	25	25	50	75	30	50	100	50	75	3	1	1	6	18	10	2	1	12	24	4	4	4	12	24	36
			average for proteins			54.1667	31.25	37.5	72.2222	69.0972	37.0833	50	50.0992	55.0475	85.2997

## Sheet: testing1
					ORIGINAL
	EF					%A					% SR					Ht					Na					Bi					N
	B1	B2	B3	B123	B45	B1	B2	B3	B123	B45	B1	B2	B3	B123	B45	B1	B2	B3	B123	B45	B1	B2	B3	B123	B45	B1	B2	B3	B123	B45
gpcr_whole	1.16364	1.32353	0.90301	1.09714	1.07522	8.88889	24.5098	31.25	66.6667	42.1875	12.1212	15.625	10.0334	36.5714	71.6814	8	25	30	192	243	66	160	299	525	339	90	102	96	288	576	864
serotonin	2.25	1.125	0.290323	1.05882	1.02632	8.33333	16.6667	8.33333	50	54.1667	25	12.5	3.22581	35.2941	68.4211	1	2	1	18	39	4	16	31	51	57	12	12	12	36	72	108
5-HT1B	3	1.125	0.818182	1.36364	1.28571	25	25	25	83.3333	50	33.3333	12.5	9.09091	45.4545	85.7143	1	1	1	10	12	3	8	11	22	14	4	4	4	12	24	36
5-HT2B	0	1.8	0	1	1	0	25	0	41.6667	58.3333	0	20	0	33.3333	66.6667	0	1	0	5	14	0	5	10	15	21	4	4	4	12	24	36
5-HT2C	0	0	0	0.642857	0.886364	0	0	0	25	54.1667	0	0	0	21.4286	59.0909	0	0	0	3	13	1	3	10	14	22	4	4	4	12	24	36
dopamine	1.28571	1.44	0.75	1.14706	1.125	8.33333	33.3333	25	72.2222	41.6667	14.2857	16	8.33333	38.2353	75	1	4	3	26	30	7	25	36	68	40	12	12	12	36	72	108
D2	2.25	2	0	1.08	1.09091	25	50	0	75	33.3333	25	22.2222	0	36	72.7273	1	2	0	9	8	4	9	12	25	11	4	4	4	12	24	36
D3	0	1.28571	1.5	1.5	1.39286	0	25	50	91.6667	54.1667	0	14.2857	16.6667	50	92.8571	0	1	2	11	13	3	7	12	22	14	4	4	4	12	24	36
D4	0	1	0.75	0.857143	0.9	0	25	25	50	37.5	0	11.1111	8.33333	28.5714	60	0	1	1	6	9	0	9	12	21	15	4	4	4	12	24	36
muscarinic	3	1.71429	1.09756	1.15385	1.11628	8.33333	33.3333	41.6667	69.4444	44.4444	33.3333	19.0476	12.1951	38.4615	74.4186	1	4	5	25	32	3	21	41	65	43	12	12	12	36	72	108
M1	0	4.5	1.38462	1.05882	1.02632	0	50	50	50	54.1667	0	50	15.3846	35.2941	68.4211	0	2	2	6	13	0	4	13	17	19	4	4	4	12	24	36
M2	9	1.28571	0.75	1.22222	1.33333	25	50	25	91.6667	33.3333	0	14.2857	8.33333	40.7407	88.8889	1	2	1	11	8	1	14	12	27	9	4	4	4	12	24	36
M4	0	0	1.125	1.14286	1.1	0	0	50	66.6667	45.8333	0	0	12.5	38.0952	73.3333	0	0	2	8	11	2	3	16	21	15	4	4	4	12	24	36
opioid	0	1.38462	1.61538	1.17857	1.09615	0	16.6667	58.3333	61.1111	52.7778	0	15.3846	17.9487	39.2857	73.0769	0	2	7	22	38	4	13	39	56	52	12	12	12	36	72	108
delta	0	1.8	0.818182	1.05882	1.02632	0	25	25	50	54.1667	0	20	9.09091	35.2941	68.4211	0	1	1	6	13	1	5	11	17	19	4	4	4	12	24	36
kappa	0	1.28571	1.92857	1.17391	1.15385	0	25	75	75	41.6667	0	14.2857	21.4286	39.1304	76.9231	0	1	3	9	10	2	7	14	23	13	4	4	4	12	24	36
NOP	0	0	1.92857	1.3125	1.125	0	0	75	58.3333	62.5	0	0	21.4286	43.75	75	0	0	3	7	15	1	1	14	16	20	4	4	4	12	24	36
			average for proteins			6.25	25	33.3333	63.1944	48.2639	4.86111	14.8909	10.1881	37.2577	74.0036
					NEW
	EF					%A					% SR					Ht					Na					Bi					N
	B1	B2	B3	B123	B45	B1	B2	B3	B123	B45	B1	B2	B3	B123	B45	B1	B2	B3	B123	B45	B1	B2	B3	B123	B45	B1	B2	B3	B123	B45
gpcr_whole	1.536	3.17647	1.5	1.12921	1.10455	4.44444	2.94118	1.04167	69.7917	42.1875	16	37.5	16.6667	37.6404	73.6364	4	3	1	201	243	25	8	6	534	330	90	102	96	288	576	864
serotonin	4.5	1.8	0.818182	1.34043	1.13115	25	8.33333	8.33333	58.3333	63.8889	50	20	9.09091	44.6809	75.4098	3	1	1	21	46	6	5	11	47	61	12	12	12	36	72	108
5-HT1B	4.5	3	1.28571	1.6875	1.275	25	25	25	75	70.8333	50	33.3333	14.2857	56.25	85	1	1	1	9	17	2	3	7	16	20	4	4	4	12	24	36
5-HT2B	6	4.5	0	1.4	1.14286	50	25	0	58.3333	66.6667	66.6667	50	0	46.6667	76.1905	2	1	0	7	16	3	2	5	15	21	4	4	4	12	24	36
5-HT2C	1.38462	9	4.5	1.6	1.21429	50	25	25	66.6667	70.8333	15.3846	100	50	53.3333	80.9524	2	1	1	8	17	13	1	2	15	21	4	4	4	12	24	36
dopamine	1.89474	3	1	1.25581	1.08462	33.3333	16.6667	8.33333	50	65.2778	21.0526	33.3333	11.1111	41.8605	72.3077	4	2	1	18	47	19	6	9	43	65	12	12	12	36	72	108
D2	0	3	6	1.5	1.39286	0	25	50	91.6667	54.1667	0	33.3333	66.6667	50	92.8571	0	1	2	11	13	10	3	3	22	14	4	4	4	12	24	36
D3	2.57143	2.57143	1.8	1.57895	1.32353	50	50	25	83.3333	62.5	28.5714	28.5714	20	52.6316	88.2353	2	2	1	10	15	7	7	5	19	17	4	4	4	12	24	36
D4	4.5	4.5	0	1.5	1.15909	50	25	0	58.3333	70.8333	50	50	0	50	77.2727	2	1	0	7	17	4	2	3	14	22	4	4	4	12	24	36
muscarinic	0.627907	1.8	1.28571	1.33784	1.36765	25	16.6667	25	91.6667	43.0556	6.97674	20	14.2857	44.5946	91.1765	3	2	3	33	31	43	10	21	74	34	12	12	12	36	72	108
M1	9	4.5	1.63636	1.63636	1.5	25	50	50	100	58.3333	100	50	18.1818	54.5455	100	1	2	2	12	14	1	4	11	22	14	4	4	4	12	24	36
M2	1.42105	3	9	1.63636	1.5	75	25	25	100	58.3333	15.7895	33.3333	100	54.5455	100	3	1	1	12	14	19	3	1	22	14	4	4	4	12	24	36
M4	0	4.5	9	1.8	1.15385	0	75	25	50	83.3333	0	50	100	60	76.9231	0	3	1	6	20	5	6	1	10	26	4	4	4	12	24	36
opioid	0.473684	4.5	1.8	1.21277	1.08197	8.33333	25	8.33333	52.7778	61.1111	5.26316	50	20	40.4255	72.1311	1	3	1	19	44	19	6	5	47	61	12	12	12	36	72	108
delta	1.8	2.25	1.8	1.71429	1.22727	25	25	25	66.6667	75	20	25	20	57.1429	81.8182	1	1	1	8	18	5	4	5	14	22	4	4	4	12	24	36
kappa	0.6	2.57143	4.5	1.38462	1.1087	25	50	25	50	70.8333	6.66667	28.5714	50	46.1538	73.913	1	2	1	6	17	15	7	2	13	23	4	4	4	12	24	36
NOP	1	9	2.25	1.90909	1.2	25	25	25	58.3333	83.3333	11.1111	100	25	63.6364	80	1	1	1	7	20	9	1	4	11	25	4	4	4	12	24	36
			average for proteins			33.3333	35.4167	25	71.5278	68.75	30.3492	48.5119	38.6778	53.7421	84.4302

## Sheet: testing2
					ORIGINAL
	EF					%A					% SR					Ht					Na					Bi					N
	B1	B2	B3	B123	B45	B1	B2	B3	B123	B45	B1	B2	B3	B123	B45	B1	B2	B3	B123	B45	B1	B2	B3	B123	B45	B1	B2	B3	B123	B45
gpcr_whole	1.25217	1.23413	1.06931	1.10707	1.08211	10	21.5686	37.5	67.0139	42.7083	13.0435	14.5695	11.8812	36.9025	72.1408	9	22	36	193	246	69	151	303	523	341	90	102	96	288	576	864
serotonin	0	1.28571	1	1.07812	1.05682	0	25	33.3333	63.8889	43.0556	0	14.2857	11.1111	35.9375	70.4545	0	3	4	23	31	7	21	36	64	44	12	12	12	36	72	108
5-HT1B	0	2.7	0	1.65	1.40625	0	75	0	91.6667	62.5	0	30	0	55	93.75	0	3	0	11	15	4	10	6	20	16	4	4	4	12	24	36
5-HT2B	0	0	1.63636	0.705882	0.868421	0	0	50	33.3333	45.8333	0	0	18.1818	23.5294	57.8947	0	0	2	4	11	0	6	11	17	19	4	4	4	12	24	36
5-HT2C	0	0	0.947368	0.888889	0.833333	0	0	50	66.6667	20.8333	0	0	10.5263	29.6296	55.5556	0	0	2	8	5	3	5	19	27	9	4	4	4	12	24	36
dopamine	0	1.03846	1.63636	1.22727	1.17857	0	25	50	75	45.8333	0	11.5385	18.1818	40.9091	78.5714	0	3	6	27	33	7	26	33	66	42	12	12	12	36	72	108
D2	0	1.38462	2.25	1.2	1.22727	0	50	50	83.3333	37.5	0	15.3846	25	40	81.8182	0	2	2	10	9	4	13	8	25	11	4	4	4	12	24	36
D3	0	0	2.11765	1.57895	1.32353	0	0	100	83.3333	62.5	0	0	23.5294	52.6316	88.2353	0	0	4	10	15	1	1	17	19	17	4	4	4	12	24	36
D4	0	0.75	0	0.954545	0.964286	0	25	0	58.3333	37.5	0	8.33333	0	31.8182	64.2857	0	1	0	7	9	2	12	8	22	14	4	4	4	12	24	36
muscarinic	3.6	1.5	1.05882	1.42105	1.23529	16.6667	25	33.3333	75	58.3333	40	16.6667	11.7647	47.3684	82.3529	2	3	4	27	42	5	18	34	57	51	12	12	12	36	72	108
M1	0	1.8	1.28571	1.57895	1.32353	0	25	50	83.3333	62.5	0	20	14.2857	52.6316	88.2353	0	1	2	10	15	0	5	14	19	17	4	4	4	12	24	36
M2	2.25	1	1	1.5	1.39286	25	25	25	91.6667	54.1667	0	11.1111	11.1111	50	92.8571	1	1	1	11	13	4	9	9	22	14	4	4	4	12	24	36
M4	9	2.25	0.818182	1.125	1.05	25	25	25	50	58.3333	100	25	9.09091	37.5	70	1	1	1	6	14	1	4	11	16	20	4	4	4	12	24	36
opioid	0	0.75	0.473684	0.771429	0.789474	0	8.33333	25	50	27.7778	0	8.33333	5.26316	25.7143	52.6316	0	1	3	18	20	1	12	57	70	38	12	12	12	36	72	108
delta	0	0	0	0.807692	0.75	0	0	0	58.3333	20.8333	0	0	0	26.9231	50	0	0	0	7	5	1	3	22	26	10	4	4	4	12	24	36
kappa	0	0	0.529412	0.5	0.5	0	0	25	33.3333	16.6667	0	0	5.88235	16.6667	33.3333	0	0	1	4	4	0	7	17	24	12	4	4	4	12	24	36
NOP	0	4.5	1	1.05	1.03125	0	25	50	58.3333	45.8333	0	50	11.1111	35	68.75	0	1	2	7	11	0	2	18	20	16	4	4	4	12	24	36
			average for proteins			4.16667	20.8333	35.4167	65.9722	43.75	8.33333	13.3191	10.7266	37.6108	70.3929
					NEW
	EF					%A					% SR					Ht					Na					Bi					N
	B1	B2	B3	B123	B45	B1	B2	B3	B123	B45	B1	B2	B3	B123	B45	B1	B2	B3	B123	B45	B1	B2	B3	B123	B45	B1	B2	B3	B123	B45
gpcr_whole	4.8	1.54011	2.25	1.1215	1.09878	6.66667	1.96078	2.08333	69.4444	41.8403	50	18.1818	25	37.3832	73.2523	6	2	2	200	241	12	11	8	535	329	90	102	96	288	576	864
serotonin	1.8	6	4	1.5	1.13571	8.33333	16.6667	33.3333	52.7778	73.6111	20	66.6667	44.4444	50	75.7143	1	2	4	19	53	5	3	9	38	70	12	12	12	36	72	108
5-HT1B	4.5	4.5	4.5	1.63636	1.14	50	50	25	50	79.1667	50	50	50	54.5455	76	2	2	1	6	19	4	4	2	11	25	4	4	4	12	24	36
5-HT2B	4.5	6	3	1.5	1.15909	25	50	25	58.3333	70.8333	50	66.6667	33.3333	50	77.2727	1	2	1	7	17	2	3	3	14	22	4	4	4	12	24	36
5-HT2C	0	4.5	9	2.1	1.21154	0	25	25	58.3333	87.5	0	50	100	70	80.7692	0	1	1	7	21	6	2	1	10	26	4	4	4	12	24	36
dopamine	0.9	4.5	3	1.17391	1.06452	8.33333	16.6667	16.6667	50	61.1111	10	50	33.3333	39.1304	70.9677	1	2	2	18	44	10	4	6	46	62	12	12	12	36	72	108
D2	0.75	2.25	4.5	1.83333	1.41667	25	25	25	91.6667	70.8333	8.33333	25	50	61.1111	94.4444	1	1	1	11	17	12	4	2	18	18	4	4	4	12	24	36
D3	3	3.6	1.5	1.5	1.3125	75	50	25	83.3333	58.3333	33.3333	40	16.6667	50	87.5	3	2	1	10	14	9	5	6	20	16	4	4	4	12	24	36
D4	0.818182	1.8	9	1.71429	1.22727	25	25	25	66.6667	75	9.09091	20	100	57.1429	81.8182	1	1	1	8	18	11	5	1	14	22	4	4	4	12	24	36
muscarinic	3	2	0.9	1.52308	1.39535	66.6667	33.3333	16.6667	91.6667	55.5556	33.3333	22.2222	10	50.7692	93.0233	8	4	2	33	40	24	18	20	65	43	12	12	12	36	72	108
M1	1.8	3	3	1.65	1.40625	50	25	25	91.6667	62.5	20	33.3333	33.3333	55	93.75	2	1	1	11	15	10	3	3	20	16	4	4	4	12	24	36
M2	0.5	6	3.6	1.63636	1.5	25	50	50	100	58.3333	5.55556	66.6667	40	54.5455	100	1	2	2	12	14	18	3	5	22	14	4	4	4	12	24	36
M4	4.5	3	6	2.33333	1.22222	75	25	50	58.3333	91.6667	50	33.3333	66.6667	77.7778	81.4815	3	1	2	7	22	6	3	3	9	27	4	4	4	12	24	36
opioid	1.125	3.6	2	1.30435	1.1129	16.6667	16.6667	16.6667	55.5556	63.8889	12.5	40	22.2222	43.4783	74.1935	2	2	2	20	46	16	5	9	46	62	12	12	12	36	72	108
delta	2.57143	2.25	3.6	1.5	1.2	50	25	50	66.6667	66.6667	28.5714	25	40	50	80	2	1	2	8	16	7	4	5	16	20	4	4	4	12	24	36
kappa	1.2	9	1.8	1.3125	1.125	50	50	25	58.3333	62.5	13.3333	100	20	43.75	75	2	2	1	7	15	15	2	5	16	20	4	4	4	12	24	36
NOP	4.5	4.5	3.6	1.5	1.125	100	50	50	50	75	50	50	40	50	75	4	2	2	6	18	8	4	5	12	24	4	4	4	12	24	36
			average for proteins			45.8333	37.5	33.3333	69.4444	71.5278	26.5182	46.6667	49.1667	56.1561	83.5863
